# Supplementary material for: Informing an investment case for Japanese encephalitis vaccine introduction in Bangladesh
Source: PubMed Central journal article supplement — Sci Adv. 2024 Aug 9;10(32):eadp1657. doi: 10.1126/sciadv.adp1657 (PMC11313847; doi:10.1126/sciadv.adp1657), 2024-08-09
Supplement: sciadv.adp1657_sm.pdf [file sciadv.adp1657_sm.pdf]

Supplementary Materials for  
**Informing an investment case for Japanese encephalitis vaccine introduction  
in Bangladesh**

Mariana Perez Duque *et al.*

Corresponding author: Mariana Perez Duque, mp2024@cam.ac.uk; Henrik Salje, hs743@cam.ac.uk

*Sci. Adv.* **10**, eadp1657 (2024)  
DOI: 10.1126/sciadv.adp1657

**This PDF file includes:**

Table S1  
Figs. S1 to S4

## Supplementary Text

**Table S1.** Mixed effects multivariate logistic regression models and corresponding Widely Applicable Bayesian Information Criterion (WAIC).

| <b>Random effects</b>                                                                               | <b>WAIC</b> |
|-----------------------------------------------------------------------------------------------------|-------------|
| Seroprevalence ~ -1 + Intercept + offset(log(age)) + f(household) + f(spatial field)                | 1050.33     |
| Seroprevalence ~ -1 + Intercept + offset(log(age)) + f(community) + f(spatial field)                | 1050.34     |
| Seroprevalence ~ -1 + Intercept + offset(log(age)) + f(spatial field)                               | 1050.53     |
| Seroprevalence ~ -1 + Intercept + offset(log(age)) + f(household) + f(community) + f(spatial field) | 1050.42     |
| Seroprevalence ~ -1 + Intercept + offset(log(age)) + f(household) + f(community)                    | 1056.41     |
| Seroprevalence ~ -1 + Intercept + offset(log(age)) + f(community)                                   | 1056.60     |
| Seroprevalence ~ -1 + Intercept + offset(log(age)) + f(household)                                   | 1092.39     |
| Seroprevalence ~ -1 + Intercept + offset(log(age))                                                  | 1092.41     |

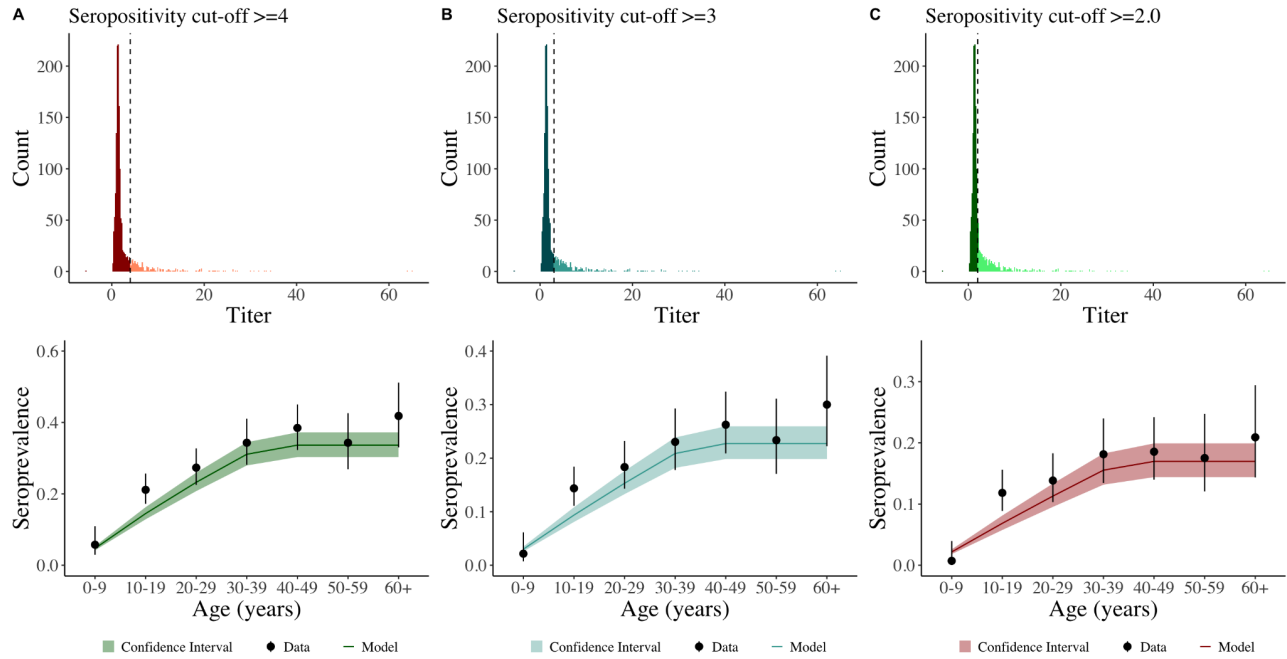

**Fig. S1.** Sensitivity analysis around JEV titer cut point. Titer is the relative median fluorescence intensity value, obtained dividing the median fluorescence intensity measured over a background control.

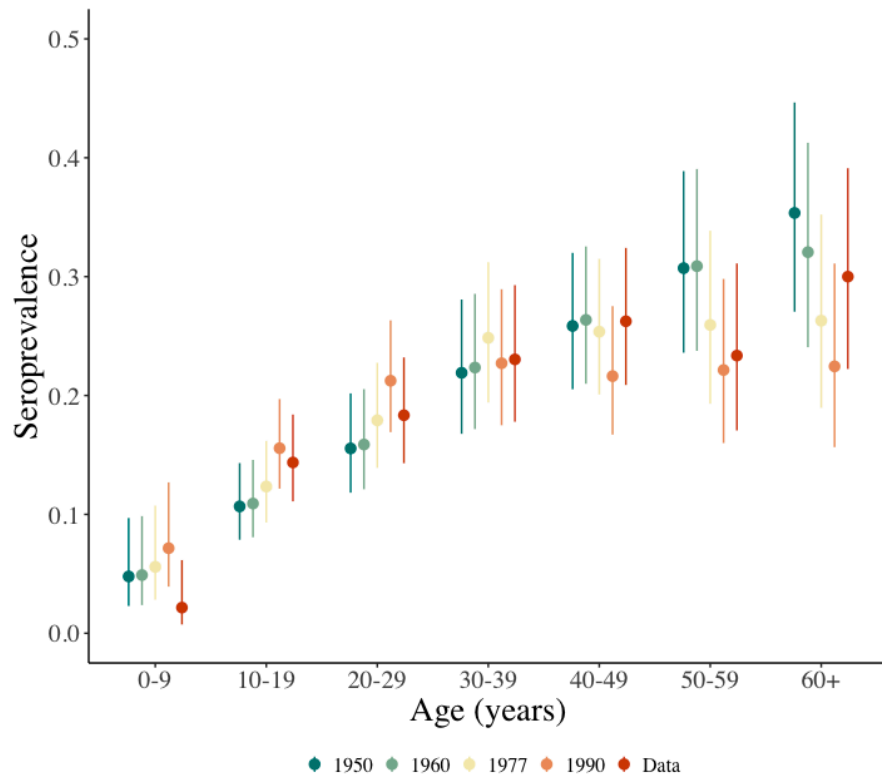

**Fig. S2.** Sensitivity analysis around JEV introduction year. Figure shows JEV IgG seroprevalence and 95%CI (point and range) by age group and coloured by JEV introduction year (1950, 1960, 1977, 1990).

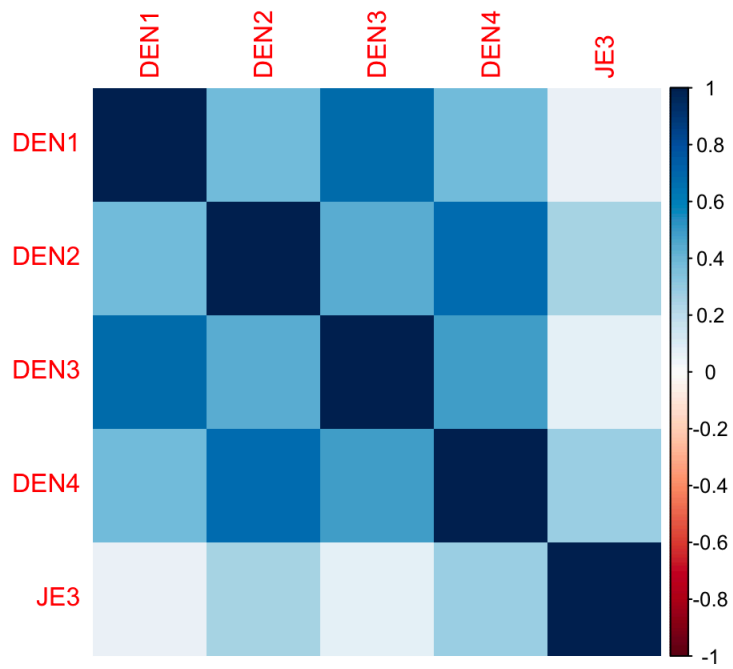

**Fig. S3.** Mean relative fluorescence intensity of the JEV antigen with the mean relative fluorescence intensity to the four DENV1-4 antigens.

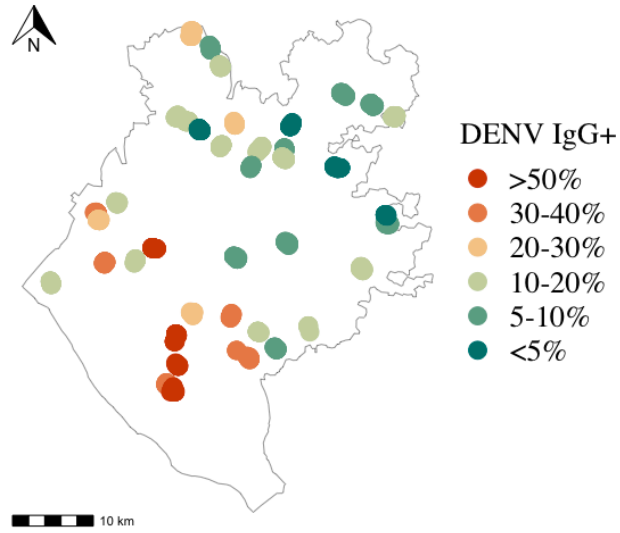

**Fig. S4.** Map of sampled communities locations in Chapai Nawabganj and proportion of human individuals of DENV IgG seropositive.
